# Supplementary material for: Construction of a TTN Mutation-Based Prognostic Model for Evaluating Immune Microenvironment, Cancer Stemness, and Outcomes of Colorectal Cancer Patients
Source: Hindawi journal article supplement (doi:10.1155/2023/6079957), 2023-02-21

**A**

KEGG pathway (Up-regulated genes)

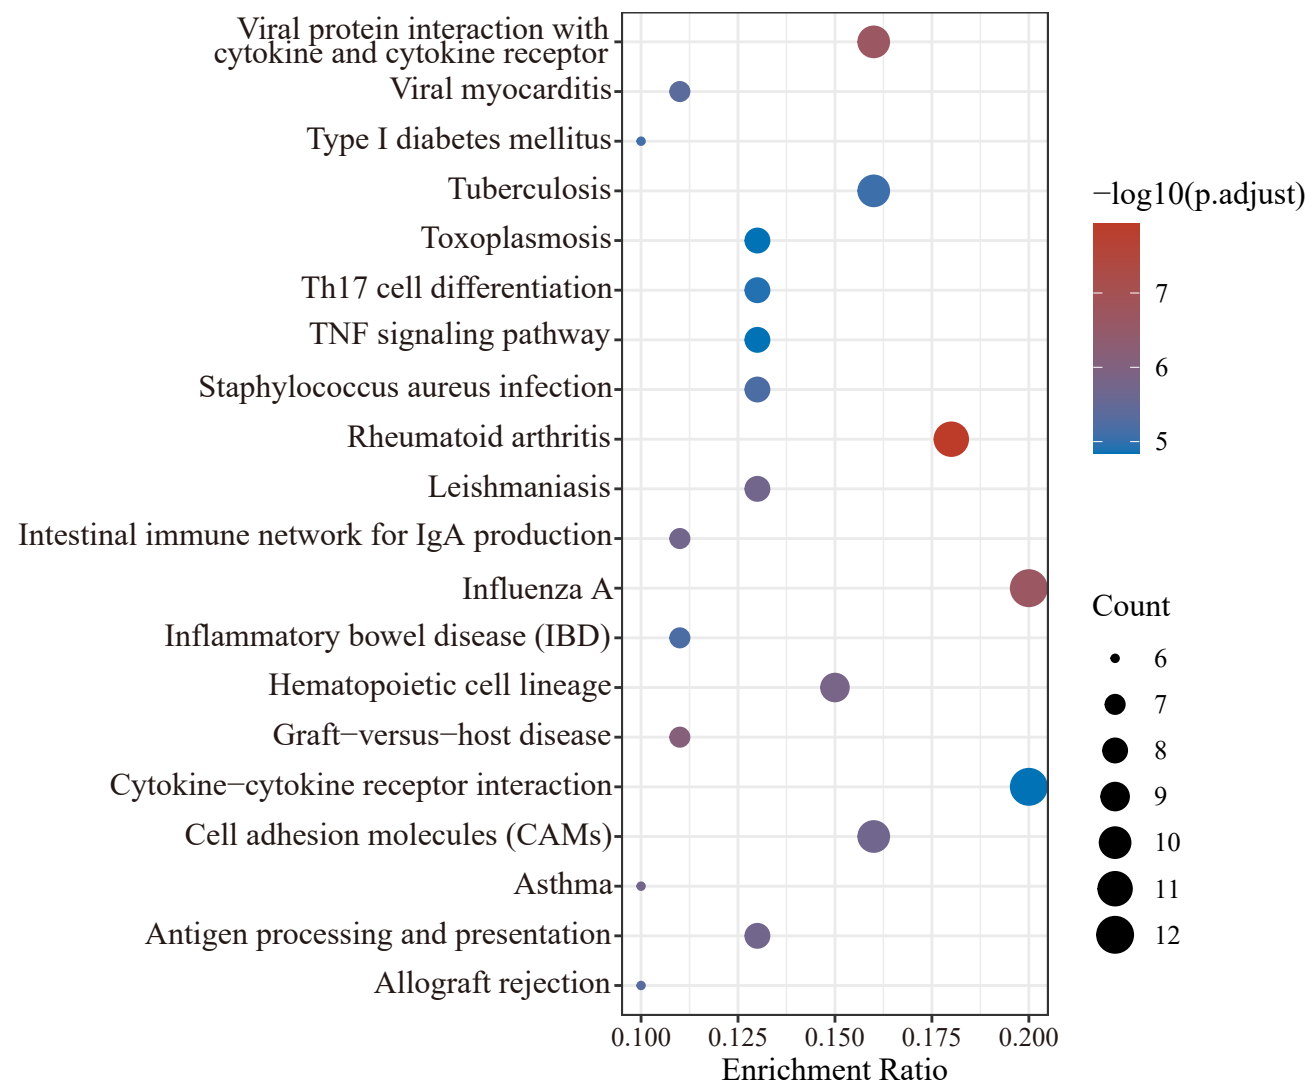**B**

GO (Up-regulated genes)

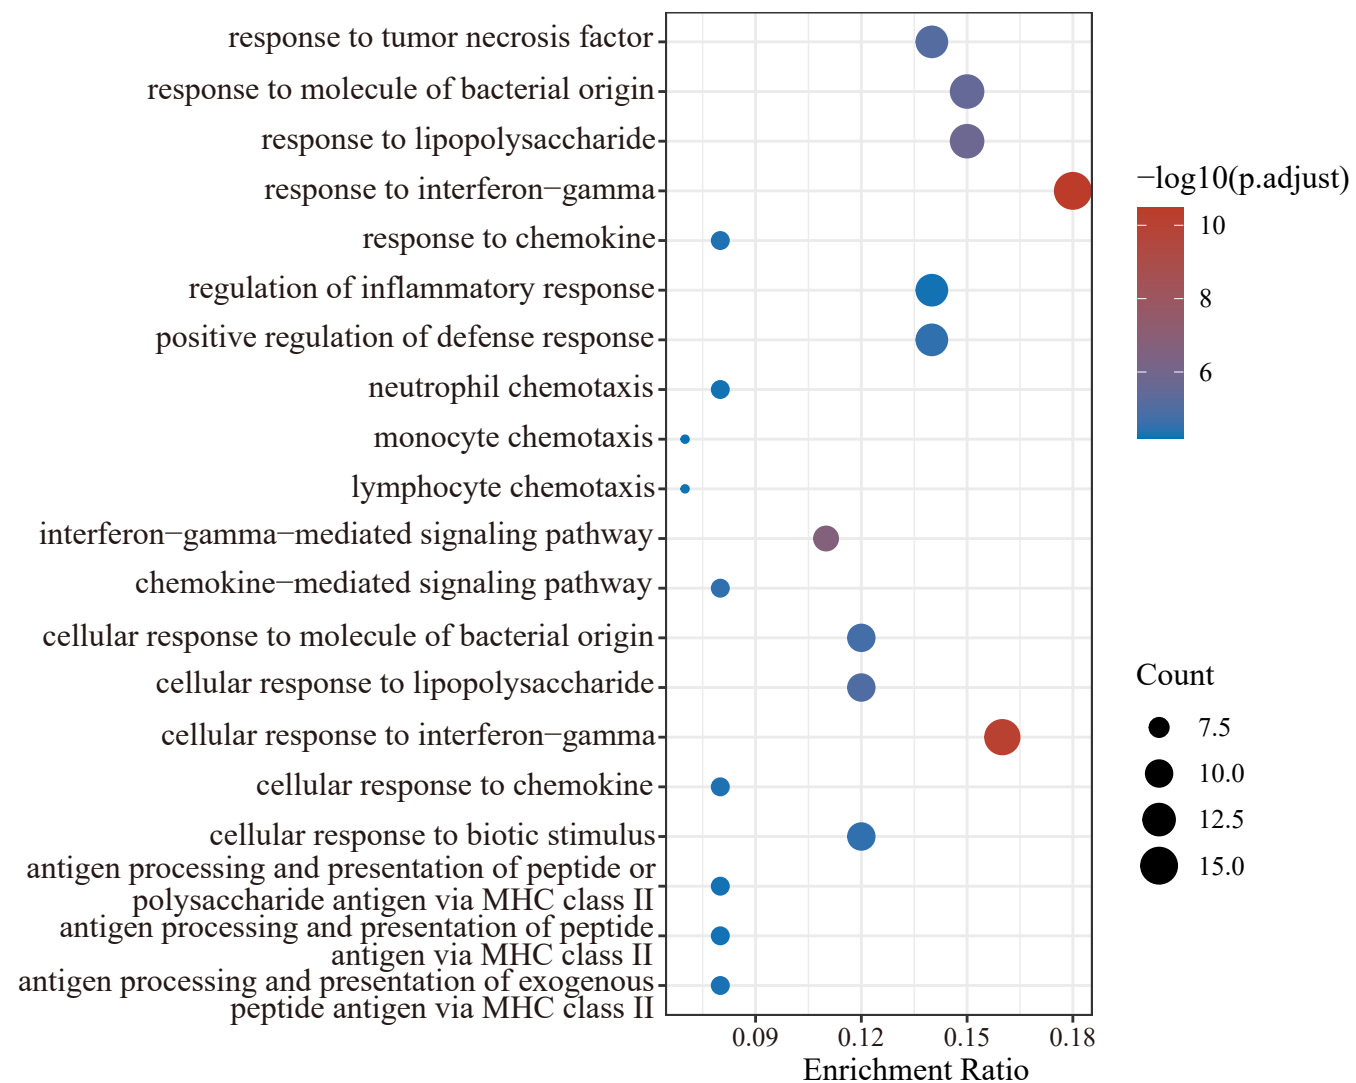**C**

KEGG pathway (Down-regulated genes)

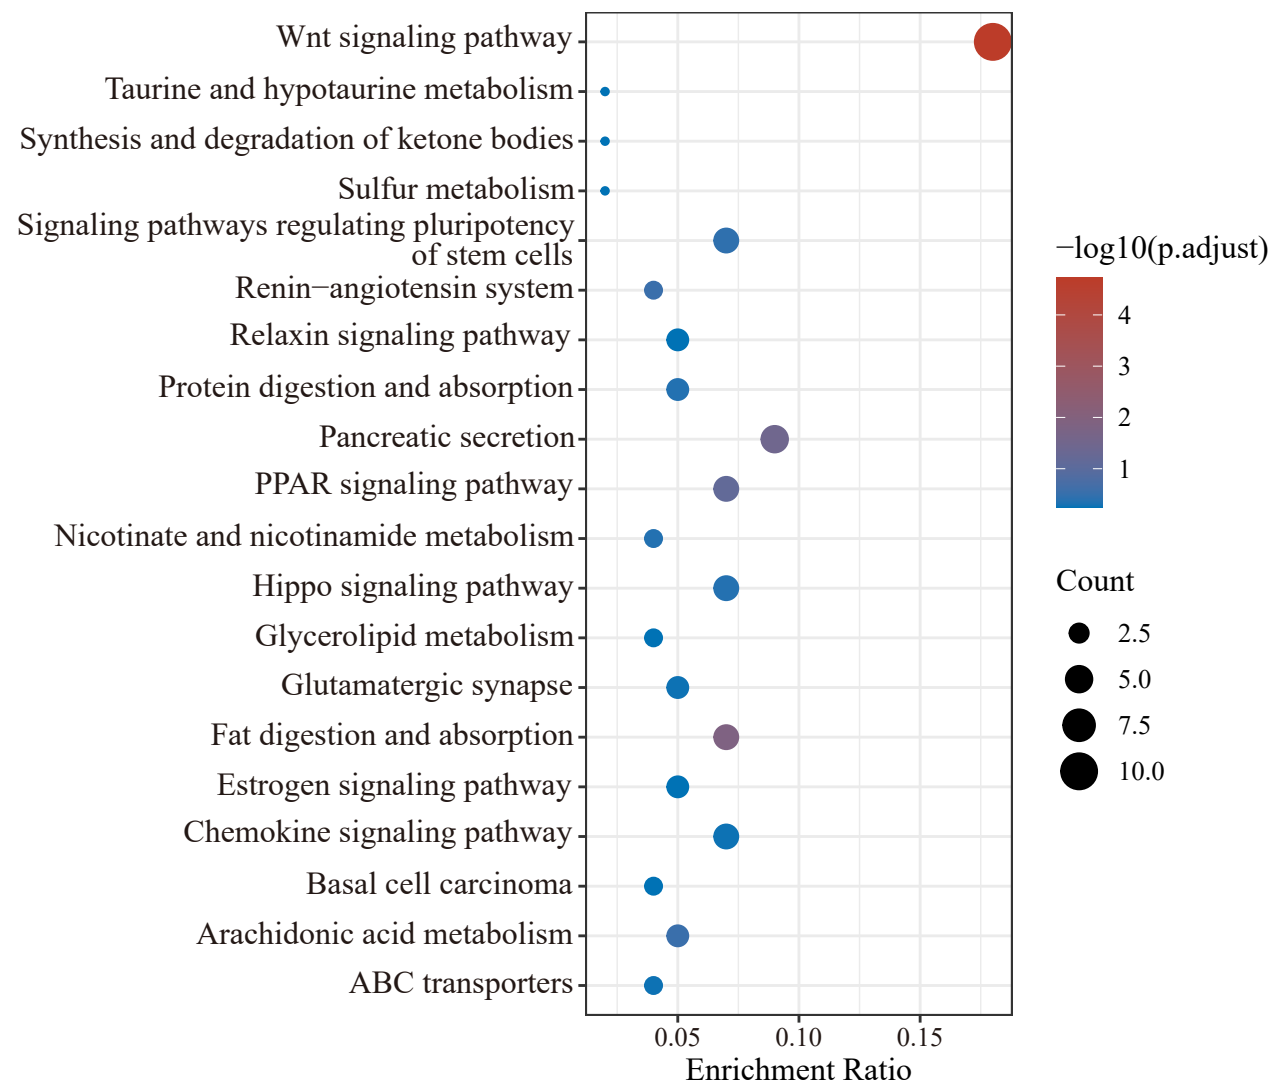**D**

GO (Down-regulated genes)

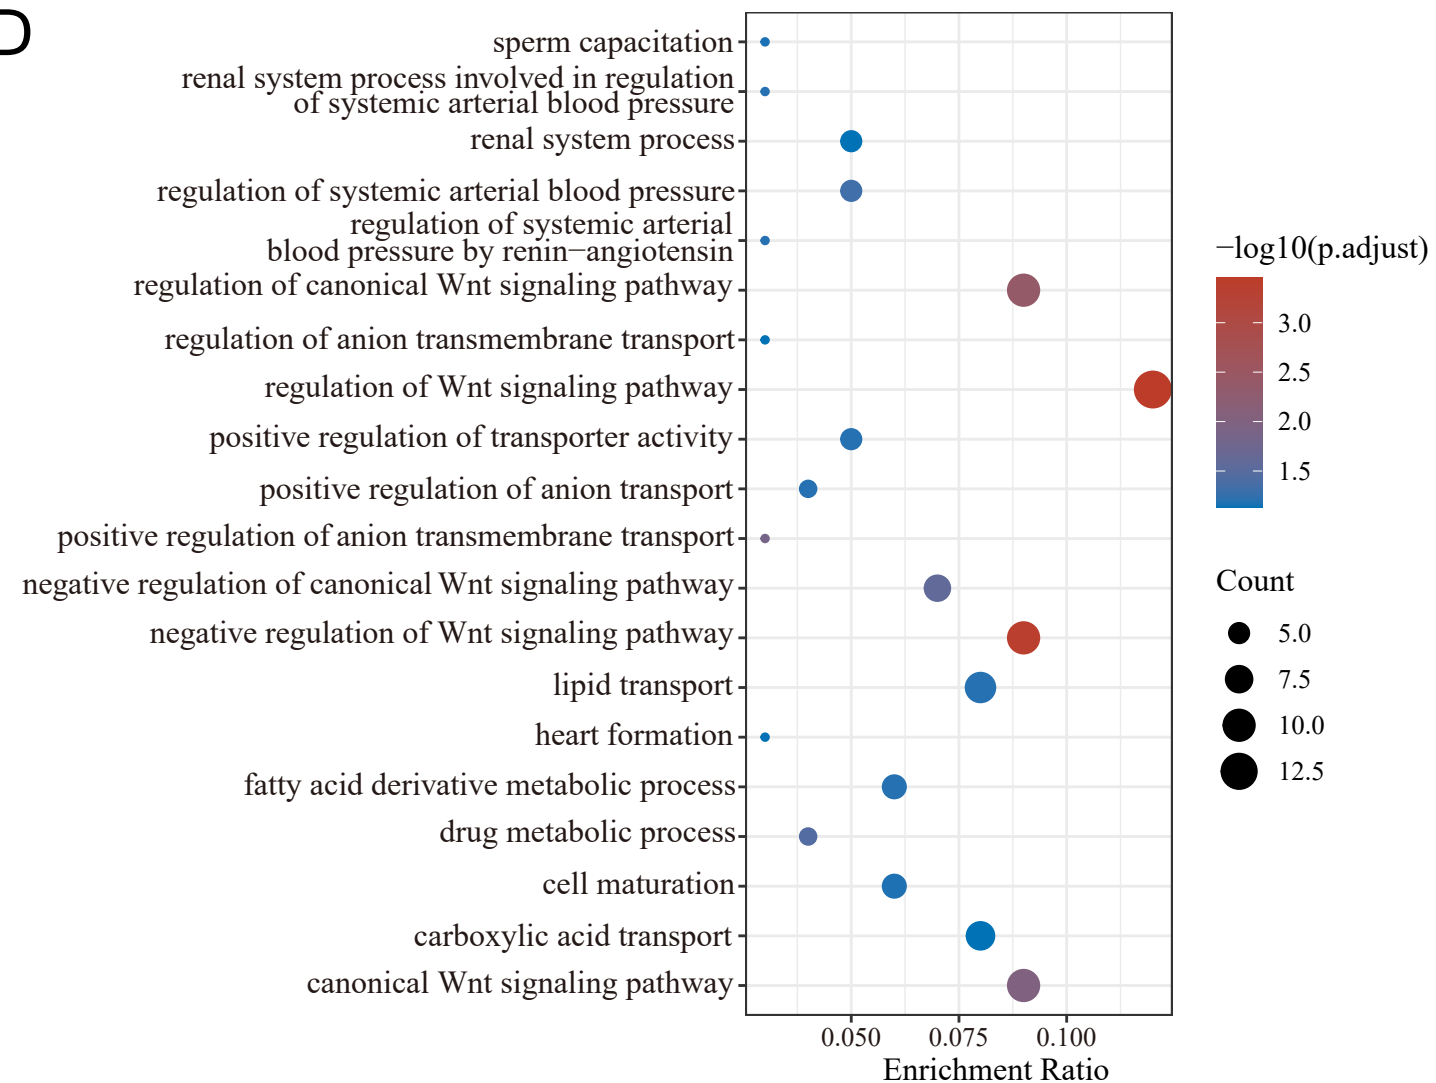

Supplement: f1 [file 6079957.f1.pdf]
