# Supplementary material for: Construction of a TTN Mutation-Based Prognostic Model for Evaluating Immune Microenvironment, Cancer Stemness, and Outcomes of Colorectal Cancer Patients
Source: Hindawi journal article supplement (doi:10.1155/2023/6079957), 2023-02-21

A

KEGG pathway (Up-regulated genes)

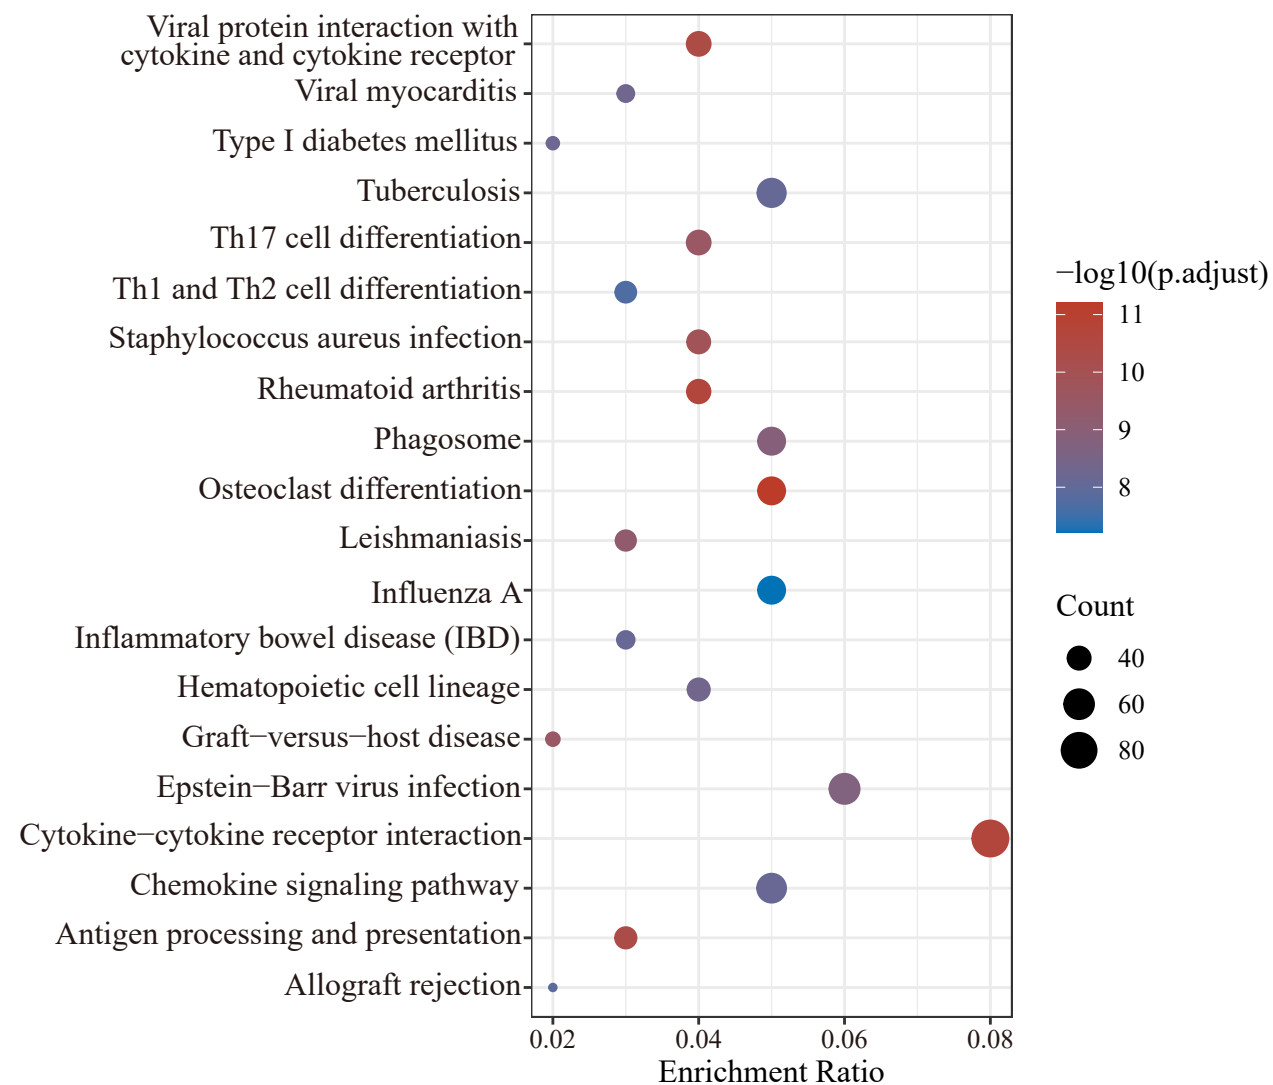

B

GO (Up-regulated genes)

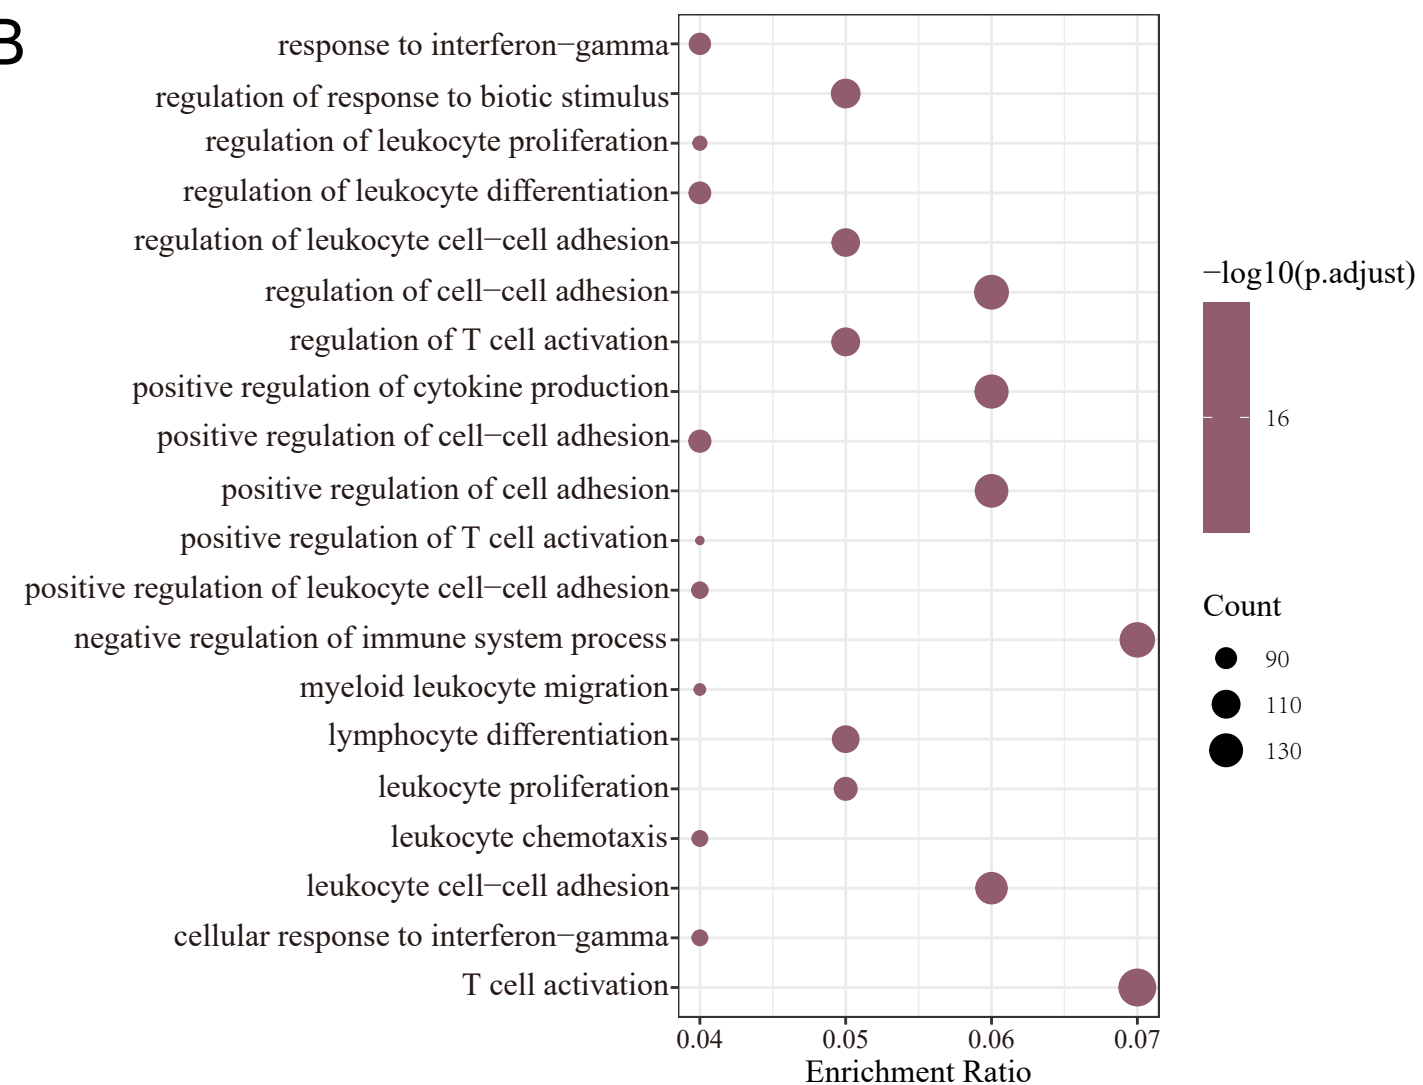

C

KEGG pathway (Down-regulated genes)

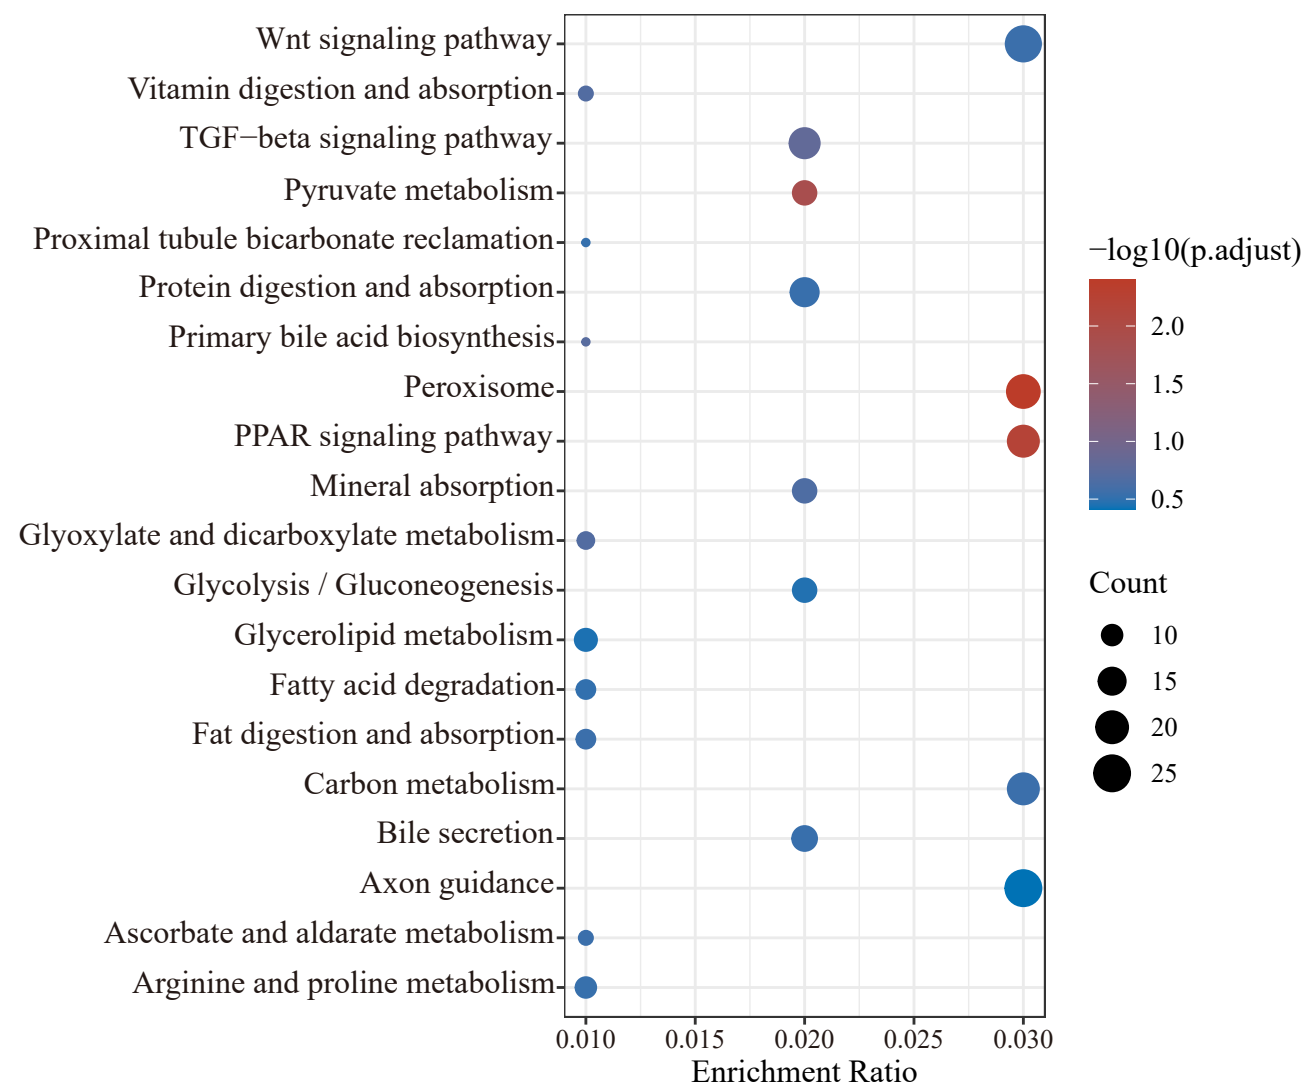

D

GO (Down-regulated genes)

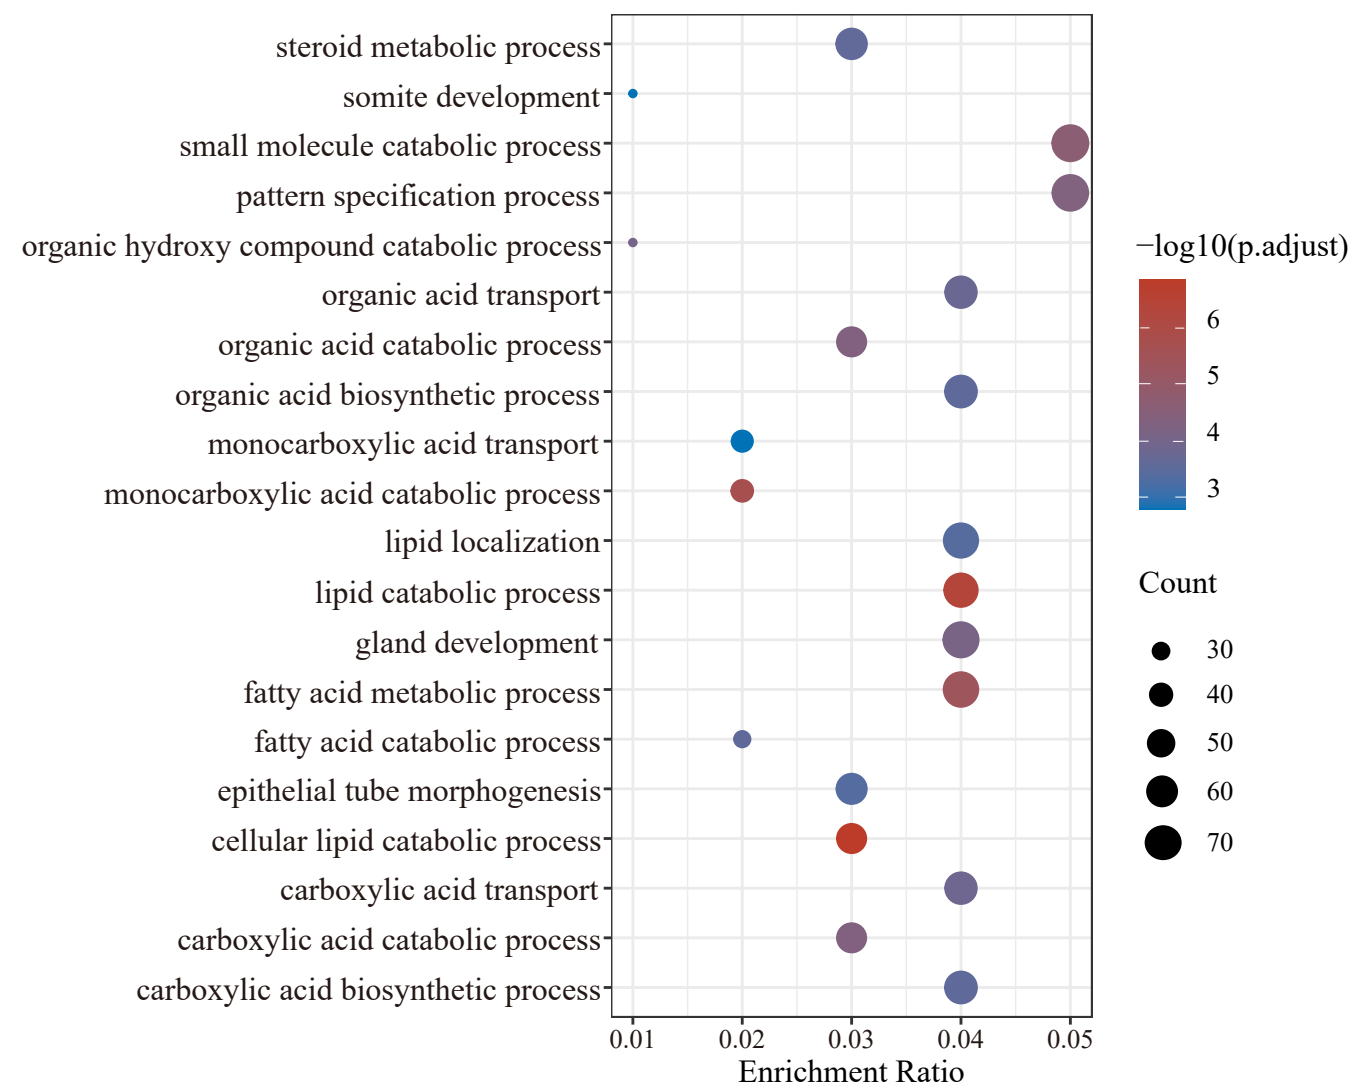

Supplement: f2 [file 6079957.f2.pdf]
